# Supplementary material for: Relay proton transfer triggered twisted intramolecular charge transfer
Source: Royal Society of Chemistry journal article supplement (doi:10.1039/c5pp00339c), 2015-10-13
Supplement: c5pp00339c1.pdf [file c5pp00339c1.pdf]

**Relay Proton Transfer Triggered Twisted Intramolecular Charge Transfer†**

Santosh Kumar Behera and G. Krishnamoorthy\*  
Department of Chemistry  
Indian Institute of Technology Guwahati  
Guwahati, Assam 781039  
India

E-mail: [gkrishna@iitg.ernet.in](mailto:gkrishna@iitg.ernet.in)

**Electronic Supplementary Information**

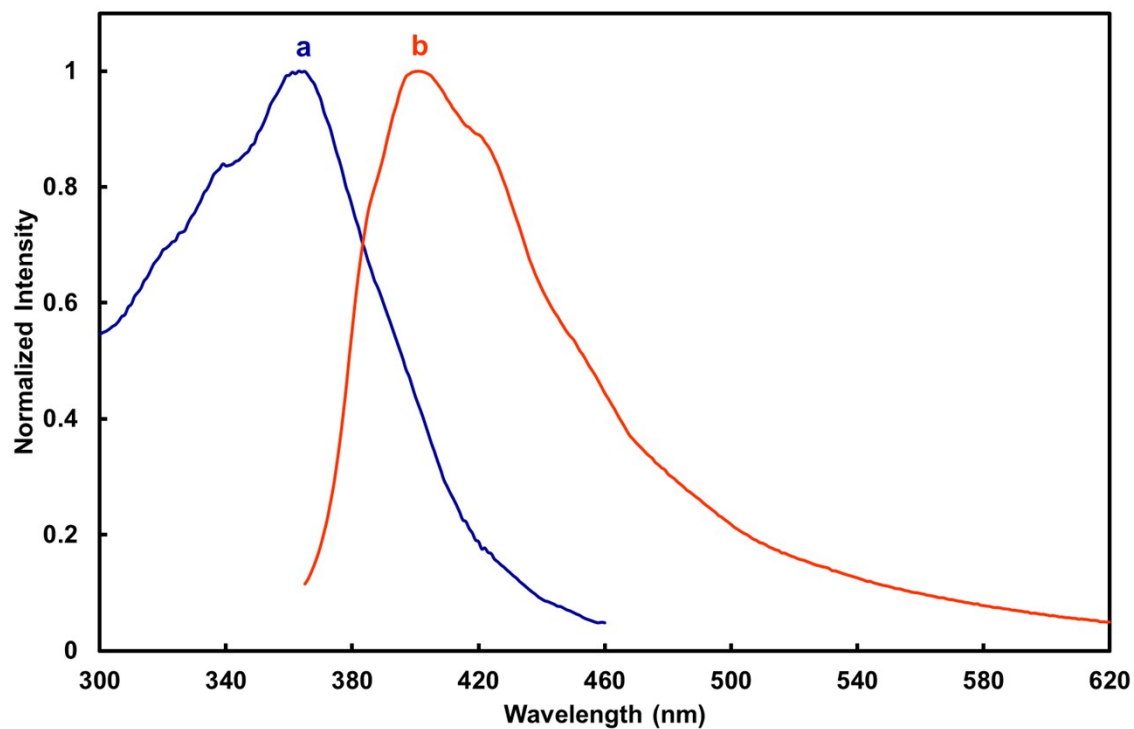

Fig. S1. Mirror Image relationship between the excitation spectrum (a),  $\lambda_{em} = 480$  nm and emission spectrum (b),  $\lambda_{ex} = 355$  nm for DMAPIP-PyMe in cyclohexane.

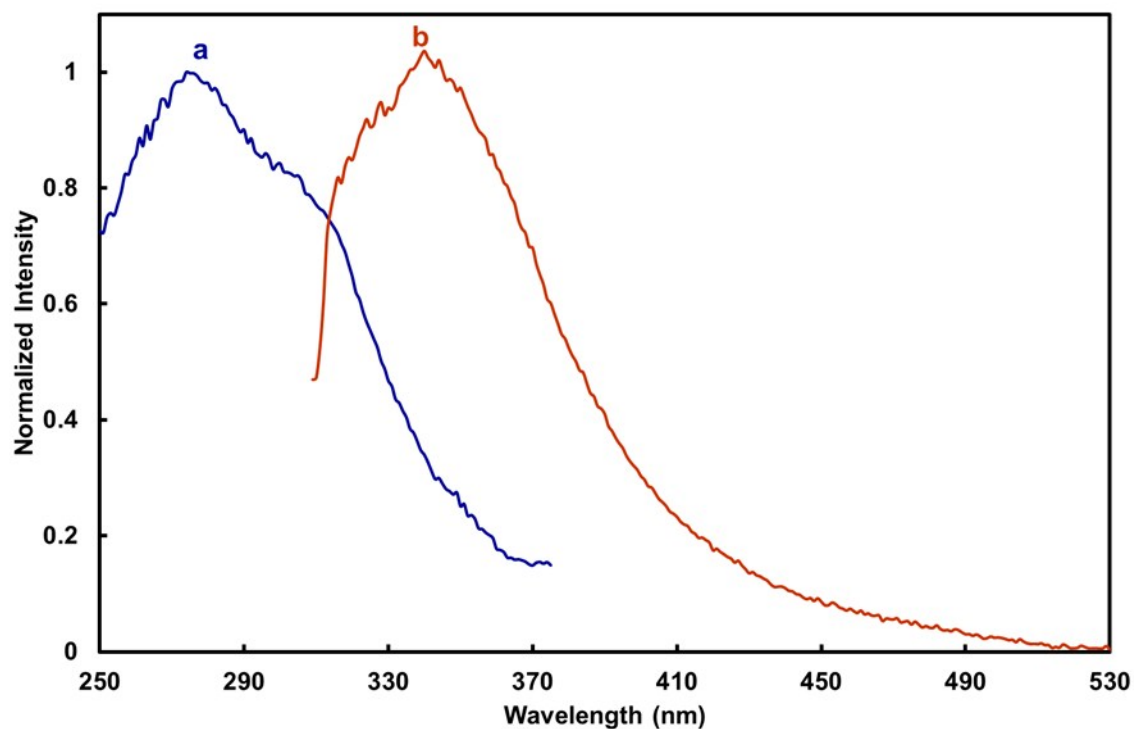

Fig. S2. Mirror Image relationship between the excitation spectrum (a),  $\lambda_{em} = 420$  nm and emission spectrum (b),  $\lambda_{ex} = 320$  nm for DMAPIP-ImMe in cyclohexane.

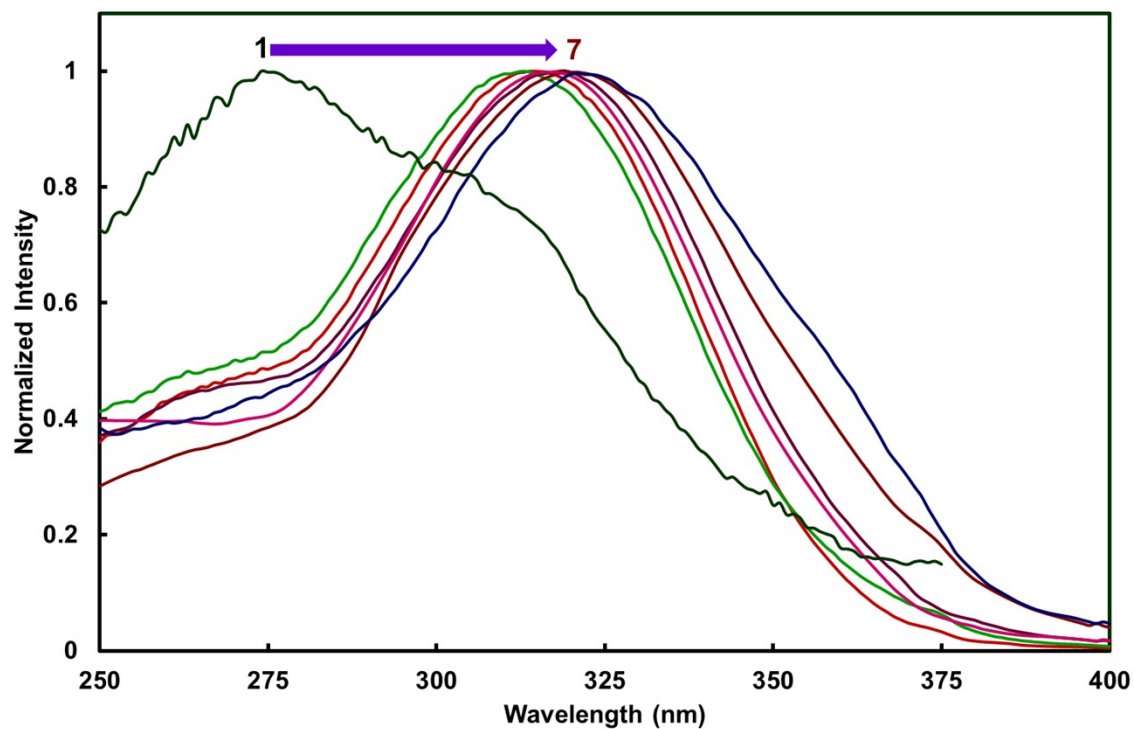

Fig. S3. Normalised fluorescence excitation spectra of DMAPIP-ImMe in some selected solvents: (1) cyclohexane, (2) acetonitrile (3) methanol , (4) DMF (5) propanol (6) tetrahydrofuran, (7) DMSO, ( $\lambda_{em} = 420$  nm).

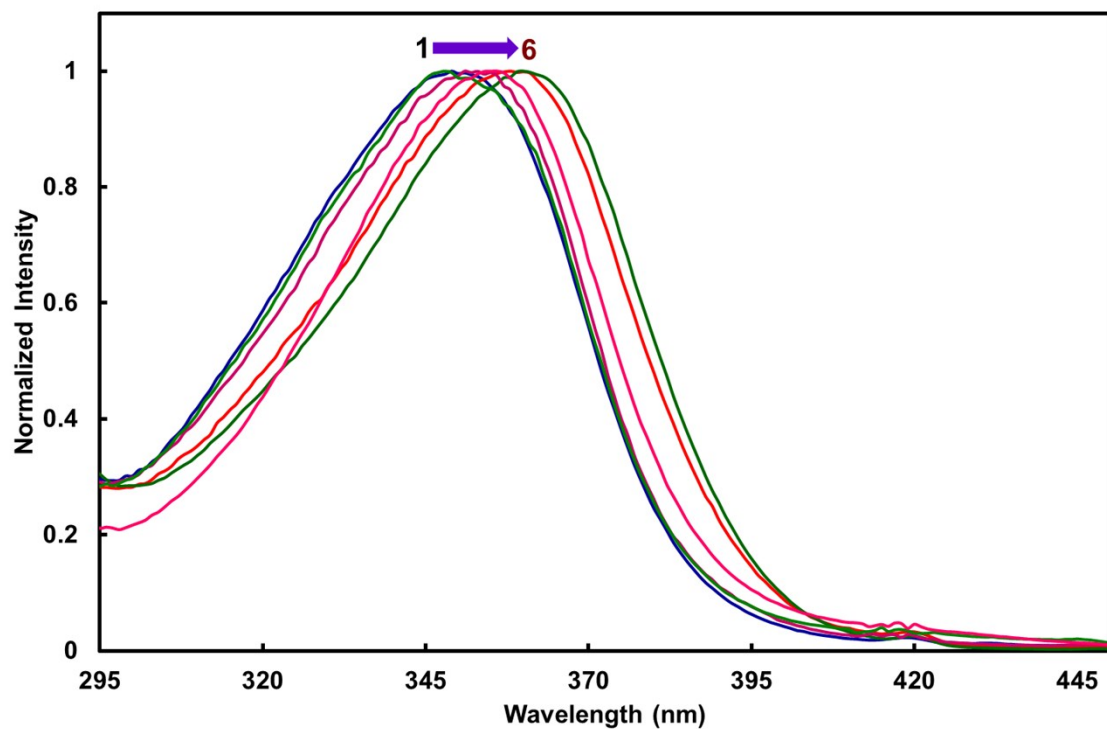

Fig. S4. Normalised fluorescence excitation spectra of DMAPIP-PyMe in some selected solvents: (1) acetonitrile (2) DMF (3) tetrahydrofuran, (4) DMSO, (5) methanol, (6) butanol ( $\lambda_{em} = 480$  nm).

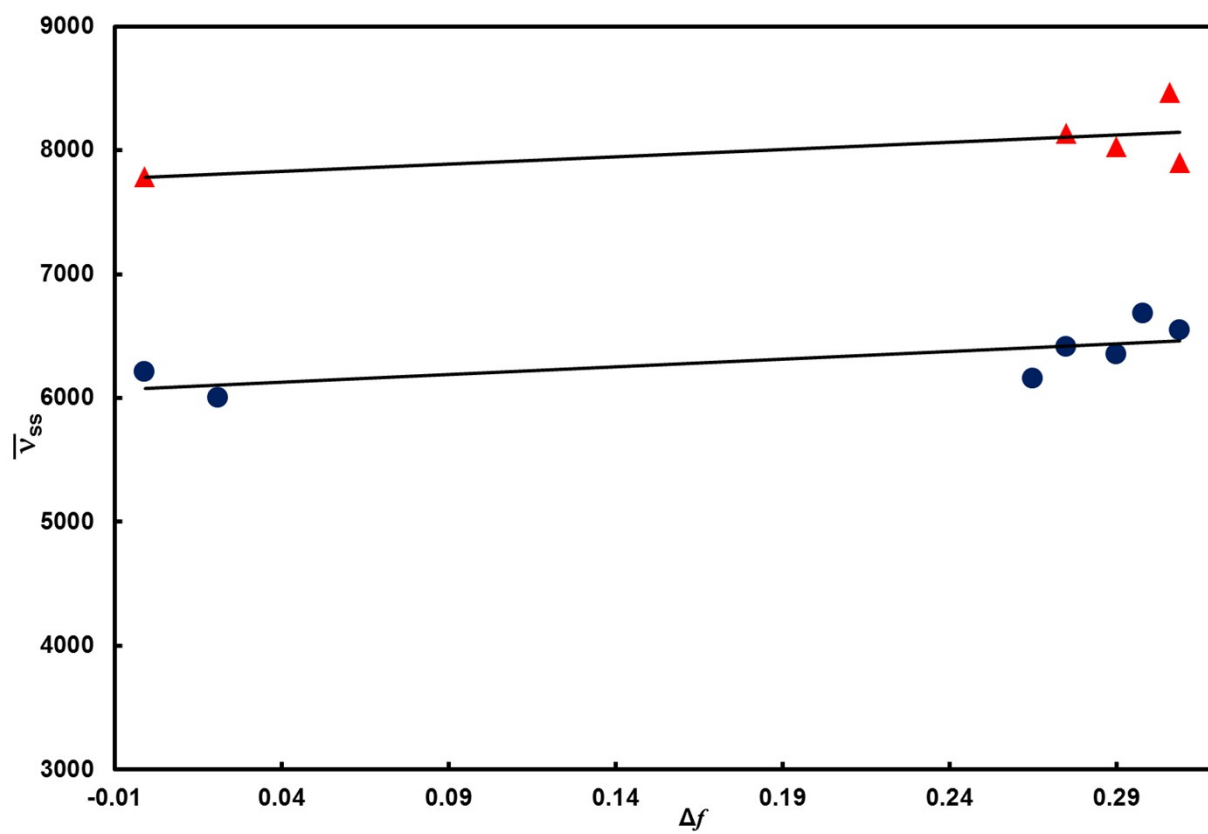

Fig. S5. Lippert-Mataga plot for DMAPIP-ImMe ( $\blacktriangle$ ) and DMAPIP-PyMe ( $\bullet$ )

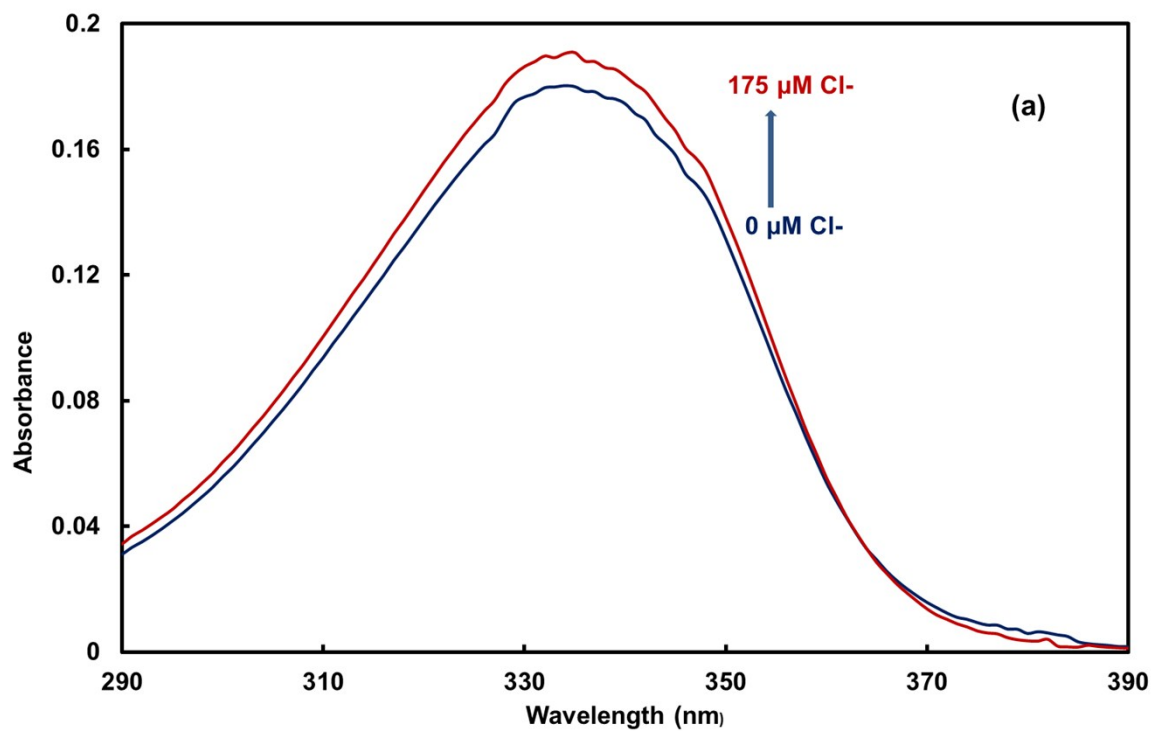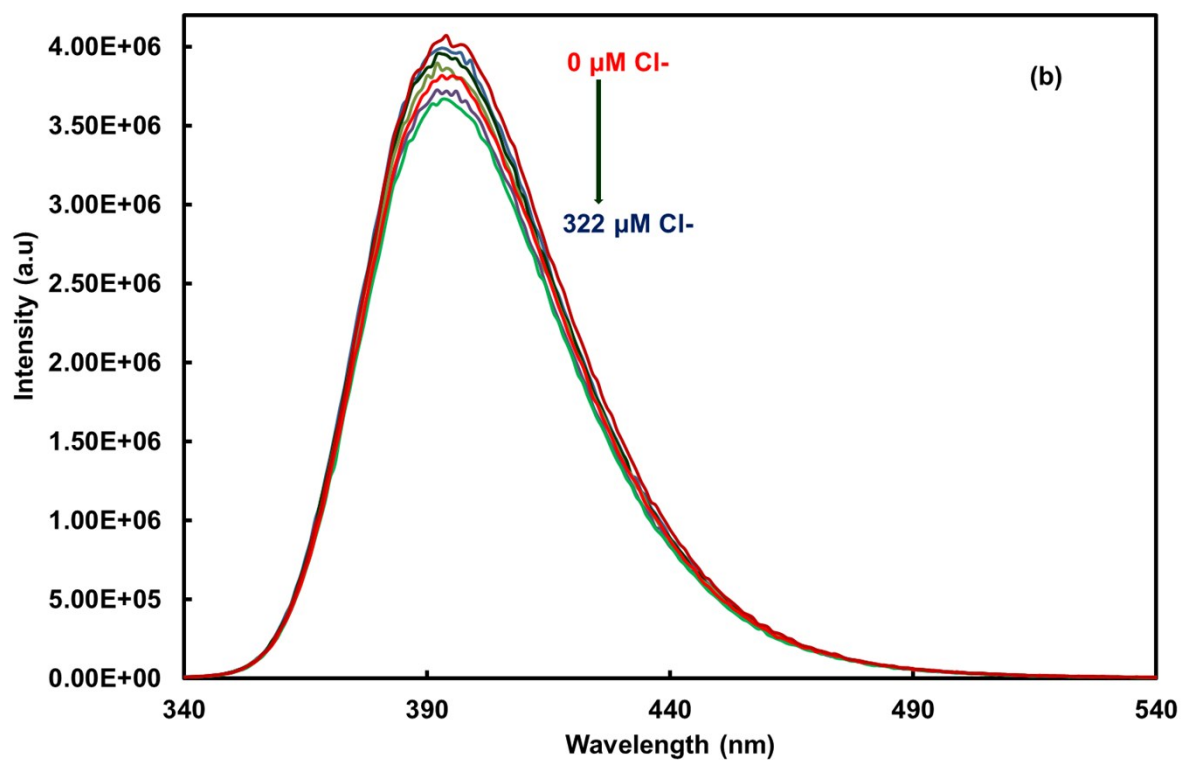

Fig. S6. (a) Absorption spectra and (b) Fluorescence spectra of DMAPIP-c at different chloride ion concentration in acetonitrile ( $\lambda_{\text{exc}} = 330 \text{ nm}$ ).
